# Supplementary material
Source: publisher site journal article supplement (https://www.dovepress.com/article/403087)
Supplement: Supplementary file 1 [file get_supplementary_file.php]

Table S1. The data of feces pH, food intake (g), body weight (g), spleen index and liver index showed in figure 1b-f showed as mean (SD).

|  | Time point | CON | LGG | TMZ | LGG+TMZ |
| --- | --- | --- | --- | --- | --- |
| pH | Day1 | 7.34 (0.03) | 7.35 (0.05) | 7.35 (0.03) | 7.33 (0.02) |
| Day14 | 7.36 (0.04) | 7.23 (0.01) | 7.48 (0.03) | 7.24 (0.02) |
| Body weight (g) | Day-7 | 19.84 (0.65) | 19.74 (0.57) | 19.78 (0.42) | 19.80 (0.60) |
| Day1 | 21.34 (0.54) | 21.60 (0.21) | 21.46 (0.65) | 21.16 (0.79) |
| Day7 | 21.60 (0.43) | 21.82 (0.26) | 21.76 (0.63) | 21.60 (0.52) |
| Day14 | 22.44 (0.34) | 22.98 (0.37) | 20.98 (0.70) | 21.46 (0.74) |
| Day21 | 22.80 (0.35) | 23.36 (0.48) | 20.70 (0.72) | 21.80 (0.67) |
| Food intake (g) | Day -7-1 | 28.77 (0.81) | 27.64 (0.86) | 28.08 (1.01) | 28.08 (0.79) |
| Day 1-7 | 28.52 (0.36) | 28.21 (0.40) | 28.54 (0.51) | 28.30 (0.89) |
| Day 7-14 | 28.25 (1.10) | 28.47 (0.75) | 25.23 (0.83) | 26.75 (1.20) |
| Day 14-21 | 28.90 (0.29) | 28.39 (0.70) | 24.65 (1.34) | 27.20 (0.61) |
| Spleen index | Day14 | 0.003226  (0.000391) | 0.003439  (0.000255) | 0.005888  (0.000502) | 0.004514  (0.00032) |
| Liver index | Day14 | 0.062046  (0.003014) | 0.061668  (0.003206) | 0.065259  (0.002999) | 0.064114  (0.00319) |

CON, control group; LGG, Lactobacillus rhamnosus GG; TMZ, temozolomide.

Table S2. The data of small intestine length (cm), expression of ZO-1 and Occludin standardized by actin in figure 2, showed as mean (SD).

|  | CON | LGG | TMZ | LGG+TMZ |
| --- | --- | --- | --- | --- |
| Small intestine length (cm) | 28.35 (0.90) | 32.4 (0.95) | 26.05 (1.48) | 29.73 (0.62) |
| ZO-1/Actin | 1.06 (0.29) | 1.15 (0.28) | 0.47 (0.18) | 1.07 (0.12) |
| Occludin/Actin | 1.38 (0.26) | 1.25 (0.42) | 0.57 (0.11) | 1.13 (0.13) |

CON, control group; LGG, Lactobacillus rhamnosus GG; TMZ, temozolomide.

Table S3. The data of expression of IL-1β, IL-6, IL-10, TNF-α in figure 3, showed as mean (SD).

|  | CON | LGG | TMZ | LGG+TMZ |
| --- | --- | --- | --- | --- |
| IL-1β | 44.84 (21.14) | 47.03 (9.65) | 23.93 (5.32) | 54.76 (13.45) |
| IL-6 | 336.43 (64.08) | 221.28 (28.34) | 107.15 (20.37) | 120.42 (17.42) |
| IL-10 | 43.11 (24.97) | 57.05 (10.72) | 37.05 (9.28) | 44.00 (13.53) |
| TNF-α | 210.47 (65.32) | 184.94 (58.02) | 64.53 (5.61) | 85.94 (18.82) |

CON, control group; LGG, Lactobacillus rhamnosus GG; TMZ, temozolomide.

Table S4. The expression of T-IKKβ, T-IκB-α, p65, P-p65, and TLR-4 standardized by actin and P-p65/p65, P-IKKβ/T-IKKβ in figure 4, showed as mean (SD).

|  | CON | LGG | TMZ | LGG+TMZ |
| --- | --- | --- | --- | --- |
| IKKβ/Actin | 1.12 (0.34) | 1.24 (0.24) | 1.08 (0.17) | 1.08 (0.19) |
| P-IKKβ/IKKβ | 0.24 (0.18) | 0.19 (0.10) | 1.08 (0.11) | 0.81 (0.08) |
| IκB-α/Actin | 1.25 (0.21) | 1.30 (0.25) | 0.69 (0.21) | 1.13 (0.08) |
| p65/Actin | 1.31 (0.36) | 1.20 (0.14) | 1.05 (0.06) | 1.25 (0.08) |
| P-p65/p65 | 0.10 (0.03) | 0.08 (0.03) | 1.27 (0.23) | 0.79 (0.06) |
| TLR-4/Actin | 0.96 (0.30) | 0.51 (0.10) | 1.46 (0.20) | 0.80 (0.10) |

CON, control group; LGG, Lactobacillus rhamnosus GG; TMZ, temozolomide.
